# Supplementary material for: Whole-mantle convection with tectonic plates preserves long-term global patterns of upper mantle geochemistry
Source: Sci Rep. 2017 May 12;7:1870. doi: 10.1038/s41598-017-01816-y (PMC5431867; doi:10.1038/s41598-017-01816-y)
Supplement: Supplementary file 2 — Dataset 1 [file 41598_2017_1816_MOESM2_ESM.xls]

## Sheet: Suppl data
Ophiolite, location	Kurai, Altai, Russia				Yushigou, N. Qilian, China				Alexander island, Antarctica		Ligurian ophiolite, Italy			Mirdita ophiolite, Albania			Ligurian ophiolite, Italy					SW Pacific crust, Site 91			Muslim Bagh ophiolite, Pakistan		Nidar ophiolite, NW India			Xigaze ophiolite, Tibet						Central Atlantic		NW Pacific crust, Site 86 & 88						Venezuela		Semail ophiolite, Oman
Succession									Lully Foothills																																					Geotimes	Geotimes
Sample no	1-143	144	157		WQ-255	WQ-258	WQ-259		KG.2953.1		MAT1	MP2		PU3703B	PU3902B		BR101	ROS9	ROS-9 cpx sep	SCI		91/595a/10/2/21-24 #4	91/595a/10/4/76-80 #5		2003-21		ND-09-01	ND-09-02		DC998	DC9912	JD13	AR4	AR9		14/137/-/17/1W/76-78		86/581-19/1/59-61#9	88/581a/3/1/68-72 #5a	88/581c/1/1/109-110 #8d	88/581c/2/3/84-86 #4d	88/581c/3/1/119-122 #1e		04AK-40		89M214b	89M240b
Age (Ma)	600	600	600		550	550	550		~190		179	179		170	170		164	164	164	164		150	150		>145		140 ±32	140 ±32		130	130	130	130	130		120 ±5		116	116	116	116	116		c.100		95	95
Latitude	50°14'37" N	50°14'47" N	50°14'16" N		-	-	-		70.784167 S		Mt S Agostino, though R Tribuzio called it M Materano	Mt Penna (same location as E79, Montanini et al., 2008)		42o 05.37'N	42o 05.32'N		44o 15'00.97''N	Bracco-Levanto unit, Framura (same location as RFR1/1-1/3 in Rampone et al., 1998.		44o 17'38.55''N		23o 49.34'S	23o 49.34'S		-		-	-		-	-	-	-	-		25o 55.53'N		-	-	-	-	-		-		24o 15'N	24o 15'N
Longtude	87°53'01" E	87°52'45" E	87°52'46" E		-	-	-		69.629167 W					19o 89.11'E	19o 88.82'E		9o34'06.43''E			9o 42'11.66''E		165o 31.62'W	165o 31.62'W		-		-	-		-	-	-	-	-		27o 03.64'W		-	-	-	-	-		-		56o 52'E	56o 52'E
SiO2	50.02	48.94	47.28		48.46	47.87	47.76		46.65		-	-		-	-		49.16	-	-	49.71		-	50.1		49		-	-		50.7	46.56	54.27	43.3	49.43		-		-	-	-	-	-		50.3117		50.55	52.36
TiO2	1.637	1.769	1.526		2.52	1.31	1.63		1.43		1.70287	1.69505		2.20243	1.37389		1.514	1.53405	-	1.28		1.54505	1.63		0.92		0.737237	1.0317		1.37	0.78	1.29	1.86	1.42		1.0639		1.31748	0.855689	0.822489	0.882382	0.698198		0.361369		1.68	2.1
Al2O3	15.21	13.49	15.72		13.81	15.25	14.53		15.71		-	-		-	-		15.89	-	-	16.33		-	14.5		14.04		-	-		14.29	12.99	15.3	15.79	14.17		-		-	-	-	-	-		17.9709		15.15	14.3
FeO	-	-	-		8.97	7.76	8.25		-		-	-		-	-		-	-	-	-		-	-		-		-	-		5.95	3.02	2.9	9.88	9.12		-		-	-	-	-	-		-		4.12	4.24
Fe2O3	11.98	11.73	10.93		6.78	3.96	5.35		13.33		-	-		-	-		8.7	-	-	7.71		-	-		10.9		-	-		9.55	9.04	10.41	12.43	11.87		-		-	-	-	-	-		5.44646		8.09	8.57
MnO	0.228	0.208	0.206		0.2	0.17	0.14		0.15		-	-		-	-		0.143	-	-	0.141		-	0.18		0.17		-	-		0.15	0.15	0.13	0.22	0.21		-		-	-	-	-	-		0.0849743		0.19	0.18
MgO	5.76	7.23	7.07		4.62	6.72	7.1		6.41		-	-		-	-		8.78	-	-	8.81		-	6.83		8.42		-	-		5.81	7.48	5.41	6.44	8.1		-		-	-	-	-	-		9.06312		3.25	4.21
CaO	6.66	9.3	8.11		5.99	9.06	4.4		7.18		-	-		-	-		7.95	-	-	7.3		-	11.8		10.73		-	-		14.38	13.47	5.2	14.76	9.02		-		-	-	-	-	-		14.4735		7.73	6.19
Na2O	3.5	3.86	3.85		3.79	3.35	4.11		3.57		-	-		-	-		3.75	-	-	3.76		-	2.62		2.92		-	-		0.51	2.33	6.2	1.18	3.4		-		-	-	-	-	-		2.55086		5.64	5.82
K2O	0.92	0.35	0.74		0.12	0.12	0.04		1.29		-	-		-	-		0.5	-	-	0.82		-	0.48		0.3		-	-		0.02	0.02	0.22	0.25	0.11		-		-	-	-	-	-		0.0329723		0.13	0.03
P2O5	0.166	0.175	0.126		0.24	0.13	0.16		0.14		-	-		-	-		0.16	-	-	0.12		-	0.11		0.27		-	-		0.13	0.08	0.13	0.18	0.12		-		-	-	-	-	-		0.0217423		0.18	0.22
LOI	2.65	2.44	3.19		3.85	3.12	5.66		4.29		-	-		-	-		3.09	-	-	3.6		-	-		2.98		-	-		3.14	6.62	2.11	3.27	2.6		-		-	-	-	-	-		1.21		-	-
Total	98.75	99.49	98.77		100.26	99.59	99.96		100.16		-	-		-	-		99.6	-	-	99.6		-	-		100.64		-	-		100.05	99.52	100.67	99.68	100.45		-		-	-	-	-	-		101.516		99.05	100.89
Li	18.13	14.67	26.16		5.01	6	4.59		-		20.9838	13.4752		10.2999	13.7765		5.80367	41.4449	-	8.6975		18.14	9.807		-		12.23	4.946		-	-	-	-	-		22.76		11.16	14.58	12.36	40.18	12.66		-		-	-
Sc	35.63	38.64	35.75		43.7	40.5	36.6		53.8		32.7046	28.6478		39.8867	33.1097		31.0513	29.5243	-	25.4835		48.2	46.49		44.3		37.49	30.97		29.4	33.5	39.9	46.3	35.1		34.93		49.95	40.66	39.09	41.18	33.21		38.9821		-	-
Ti	10100	10850	9036		15104.9	7852.14	9770.22		8571.42		10207	10160.1		13201.4	8235.12		8890.97	9195.1	-	7480.93		9261	8946		5514.48		4419	6184		8211.78	4675.32	7732.26	11148.8	8511.48		6377		7897	5129	4930	5289	4185		2166.04		10069.9	12587.4
V	307.7	344.7	306.2		459	308	352		464		261.281	238.489		428.001	248.51		234.668	250.425	-	216.234		297.8	311.7		286		220.2	262.4		218	194	208	361	245		214.6		369.3	222.3	215	228.9	185.3		132.183		-	-
Cr	72.21	96.96	116.4		21	130	26		67		206.571	214.14		143.105	324.766		213.788	228.781	-	259.003		199.4	182.7		148		194	13.83		130	440	174	60.2	208		341.3		291.9	419.2	393.3	263.4	797.5		712.555		-	-
Mn	1586	1631	1484		-	-	-		-		1496.36	1068.26		3519.49	2056.92		993.331	1216.87	-	1011.76		1192	1312		-		1320	967.2		-	-	-	-	-		1409		1124	1663	1472	1515	1409		-		-	-
Co	35.07	41.52	37.29		66	51	42		-		32.4435	33.139		46.6953	50.1405		34.7346	39.1554	-	33.2877		36.29	41.68		49		34.85	29.49		49.7	58.7	54.7	54.5	45.3		30.17		39.86	55.07	54.17	48.59	66.49		29.6189		-	-
Ni	39.8	54.85	49.7		24.3	55.8	15.5		53		78.2871	114.988		66.4034	160.502		111.166	148.508	-	117.155		70.13	61.53		77		55.37	15.48		67.5	221.2	59	41.1	102		109.7		76.3	255.8	248.9	162.8	475.1		150.683		-	-
Cu	55.21	78.8	66.32		57.4	119	37.2		166		70.9614	65.4194		81.5665	74.496		85.6156	81.2817	-	25.3803		87.4	55.76		-		90.34	81.13		41.9	20	72.7	26.7	75.7		67.04		221.1	109.1	112.4	89.82	118		-		-	-
Zn	97.61	153.9	85.83		173	82.2	106		108		72.7786	59.6474		130.06	106.836		55.8716	64.9202	-	50.9436		96.74	109.3		50		84.23	89.34		85.9	73.5	102	102	102		148		101.1	91.2	87.38	89.98	77.66		-		-	-
Ga	19.49	20.29	20.2		21.8	18.3	18.7		-		15.7427	14.7528		19.8738	15.8624		14.5966	16.1622	-	13.7089		19.32	19.19		12.8		12.71	16.01		16	14.1	12.7	18.9	16.1		15.74		18	17.24	16.02	16.99	14.25		11.0346		-	-
Rb	15.81	3.128	9.711		1.54	1.08	0.18		38		8.49049	5.79589		0.235583	2.76922		2.3063	11.1633	-	5.02973		4.41	12.72		-		2.689	0.2967		0.54	0.32	3.84	2.28	0.71		30.53		4.475	0.5844	0.6437	5.425	0.6694		0.326809		-	0.09
Sr	280.2	287.4	299		303	365	131		60		384.124	402.948		58.2564	231.939		198.721	189.769	-	190.75		122.1	123.9		183		126.2	194		33.2	35.7	85.8	216	131		91.35		104	111.1	99.32	100.6	84.12		110.221		98	32.3
Y	47.73	52.83	33.26		46.9	30.4	28.5		30		39.3899	37.0629		54.9654	31.3277		30.476	37.3216	-	25.3243		38.85	36.75		21.9		18.83	27.69		27	18.2	32.4	44.1	29.3		27		31.52	23.19	22.79	23.49	19.38		10.7888		36.1	40
Zr	154.4	167.8	75.59		151	83.8	89.7		94		149.172	154.777		124.07	63.8389		76.5823	112.474	-	62.4499		93.74	91.05		44		50.93	74.66		78.2	45.6	84.8	119	79.5		63.6		71.1	40.76	38.19	40.19	32.37		18.6705		94.2	116.6
Nb	3.1612	3.947	2.3		8.33	5.01	5.76		5		2.79609	2.9929		3.63781	1.60776		1.90599	2.15339	-	1.38449		2.196	2.142		0.69		1.169	2.211		1.39	0.66	1.65	2.78	1.65		1.79		1.292	0.651	0.5929	0.6407	0.5125		0.434508		2.31	3.14
Mo	0.3021	1.255	0.3879		-	-	-		-		0.403909	0.192691		0.894145	0.148951		0.283163	0.290038	-	0.0901253		0.1398	0.1721		-		0.1325	0.2469		-	-	-	-	-		0.1789		0.1467	0.5468	0.2019	0.1415	0.1329		-		-	-
Sn	2.928	2.285	0.8268		-	-	-		-		1.12808	0.882214		0.775609	0.675727		1.41017	0.85447	-	0.872333		1.114	1.039		-		0.6465	0.5631		-	-	-	-	-		0.7639		0.6093	0.5088	0.5104	0.5745	0.4207		-		-	-
Sb	0.04111	0.3555	0.09402		-	-	-		-		0.0323841	0.0138754		0.0131648	0.00954956		0.0065881	0.0984012	-	0.00415037		0.04086	0.01685		-		0.3601	0.6481		-	-	-	-	-		0.09141		0.02939	0.0119	0.00659	0.02249	0.005058		-		-	-
Cs	0.8429	0.3539	0.8319		1.01	0.39	0.82		-		0.120361	0.742624		0.510453	0.559594		0.0906331	1.45289	-	0.146263		0.07779	0.3236		-		24.32	0.9475		0.37	0.03	0.25	0.12	0.05		0.2979		0.1221	0.01275	0.02614	0.2186	0.02053		-		0.001	0.004
Ba	206.7	46.29	129.8		42.6	55	53.9		24		49.619	26.9892		2.85189	17.3048		9.72712	35.0347	-	4.78719		6.821	12.48		19.5		26.32	11.16		3.57	7.57	16.3	18.8	7.46		77.74		6.001	2.473	2.274	8.965	1.942		14.0601		4.4	4.7
La	5.26	5.383	3.47		8.06	5.37	5.32		4.37		5.13415	4.95653		4.56211	3.0934		3.81553	3.55366	-	3.01409		2.95	3.17		1.44		1.98	3.019		2.74	1.47	2.84	4.41	2.61		3.371		2.122	0.993	0.9582	0.7773	0.9443		0.791438		4.87	4.96
Ce	15.68	16.58	10.49		21.62	13.37	13.43		12.2		16.1897	16.1245		13.9447	9.1662		12.5	12.9107	-	10.1793		9.503	9.948		4.63		5.808	8.604		10.5	5.53	9.86	16.7	9.86		8.623		6.93	3.519	3.413	2.782	3.344		2.51798		13.17	14.96
Pr	2.677	2.896	1.876		3.49	2.12	2.15		-		2.69357	2.68185		2.45392	1.64913		2.14306	2.34297	-	1.76877		1.79	1.791		0.9		0.9861	1.458		1.91	1.01	1.73	2.75	1.66		1.665		1.324	0.7192	0.6998	0.5815	0.6872		0.483908		2.15	2.39
Nd	14.06	15.29	10.03		17.95	10.69	10.98		10.5		13.6433	13.4207		13.3814	8.79087		10.9871	12.3521	-	9.14143		9.779	10.02		4.95		5.277	7.766		9.89	5.48	9.75	15.4	9.46		9.471		7.706	4.37	4.266	3.493	4.173		2.74613		11.48	12.94
Sm	4.723	5.21	3.528		6.15	3.48	3.58		3.32		4.3221	4.19169		4.90529	3.04063		3.51874	4.09281	-	3.0112		3.456	3.587		1.82		1.834	2.643		3.04	1.84	3.18	4.59	3.06		3.395		2.928	1.743	1.728	1.413	1.653		1.00824		3.6	4.17
Eu	1.648	1.772	1.252		1.91	1.28	1.16		1.19		1.47302	1.4914		1.67549	1.12422		1.18081	1.3823	-	1.05924		1.287	1.301		0.67		0.6946	0.9718		1.14	0.68	1.09	1.61	0.91		1.236		1.075	0.7566	0.7384	0.5945	0.696		0.52486		1.7	1.45
Gd	6.317	7.046	4.639		7.38	4.61	4.67		-		5.39293	5.08878		6.59809	3.95966		4.34969	5.17814	-	3.7505		4.903	4.993		2.52		2.52	3.675		3.86	2.5	4.28	6.13	4.05		4.536		4.14	2.713	2.666	2.204	2.57		1.36021		5.21	6.02
Tb	1.151	1.268	0.8543		1.41	0.84	0.85		0.88		0.973585	0.923986		1.27856	0.734211		0.794198	0.948993	-	0.688484		0.8962	0.9074		0.48		0.4498	0.6616		0.71	0.48	0.82	1.17	0.77		0.7626		0.7635	0.5297	0.5232	0.4249	0.5021		0.246429		0.89	1.04
Dy	7.372	8.311	5.477		8.86	5.42	5.37		-		6.13728	5.79763		8.17293	4.68075		4.90128	5.97634	-	4.26371		5.937	6.021		3.41		3.047	4.448		4.69	3.11	5.2	7.48	5.32		4.734		5.074	3.647	3.56	2.996	3.497		1.68526		6.23	7.31
Ho	1.651	1.81	1.163		1.86	1.16	1.18		-		1.33839	1.2498		1.84565	1.02441		1.0384	1.30345	-	0.922666		1.3	1.322		0.69		0.6633	0.9629		1.04	0.71	1.18	1.69	1.16		0.9681		1.11	0.8329	0.8222	0.6824	0.8061		0.35633		1.32	1.54
Er	4.789	5.252	3.38		5.28	3.38	3.29		-		3.83166	3.55067		5.24174	2.89495		2.91818	3.64231	-	2.57041		3.776	3.844		2.06		1.948	2.832		2.86	2.02	3.37	4.7	3.34		2.642		3.224	2.542	2.467	2.048	2.459		1.02534		3.78	4.34
Tm	-	-	-		0.75	0.49	0.47		-		-	-		-	-		-	-	-	-		-	-		0.34		-	-		0.41	0.29	0.52	0.7	0.49										0.16906		0.56	0.64
Yb	4.49	4.989	3.076		4.55	3.1	2.98		3.34		3.47095	3.30813		4.96405	2.64111		2.54504	3.30535	-	2.28156		3.529	3.537		2.26		1.794	2.638		3.08	2.06	3.5	4.92	3.48		2.138		2.945	2.467	2.436	2.021	2.344		0.931927		3.59	4.09
Lu	0.6799	0.743	0.4531		0.71	0.49	0.46		0.55		0.538292	0.499775		0.750991	0.387553		0.387651	0.497634	-	0.343542		0.5265	0.5163		0.33		0.2667	0.4062		0.44	0.32	0.49	0.71	0.51		0.3019		0.4272	0.3683	0.3683	0.3027	0.3591		0.166648		0.58	0.65
Hf	3.954	4.186	2.073		4.72	2.83	2.87		2.22		3.23254	3.23899		3.22962	1.73857		1.96532	2.62133	-	1.86647		2.429	2.425		1.19		1.272	1.967		2.39	1.39	2.5	3.5	2.46		1.672		1.973	1.121	1.12	0.9011	1.07		0.53579		2.59	3.23
Ta	0.479546	0.2748	0.1531		0.57	0.45	0.44		0.34		0.173319	0.179837		0.206187	0.106555		0.189645	0.134811	-	0.0978106		0.1468	0.1551		0.05		0.08857	0.1524		0.19	0.1	0.27	0.36	0.19		0.1153		0.0943	0.04844	0.04702	0.03595	0.04451		0.0246707		0.165	0.231
Pb	0.3696	3.103	0.3434		1.97	1.08	1.08		-		6.30465	0.719556		1.09705	0.345763		0.870638	0.813637	-	0.205033		4.177	0.504		-		0.5035	0.6444		0.93	0.81	9.43	0.49	0.92		0.4329		2.233	0.2257	0.42	0.1942	0.6868		-		2.05	0.51
Th	0.3165	0.344	0.1468		0.82	0.5	0.64		0.3		0.171199	0.170632		0.248846	0.13478		0.0743465	0.10582	-	0.0537719		0.133	0.1369		0.06		0.1072	0.1879		0.07	0.04	0.1	0.16	0.1		0.1198		0.07816	0.03571	0.03846	0.02542	0.03636		0.0335523		0.262	0.326
U	0.1668	0.2072	0.07654		0.27	0.14	0.23		0.6		0.0670234	0.0745053		0.0898127	0.066498		0.0228325	0.0428325	-	0.0157025		0.1614	0.248		0.03		0.04483	0.07031		0.13	0.08	0.18	0.15	0.17		0.2982		0.03123	0.01399	0.01238	0.01102	0.01352		0.015328		0.105	0.063
Nd	5.0637	6.26361	6.08446		12.0287	7.21967	6.40528		2.71727		4.11625	5.76397		8.69559	6.51369		3.88311	5.05004	7.06589	3.41445		1.23415	1.9757		2.19192		2.85331	3.20959		6.88811	3.57446	5.92086	12.2148	4.37181		1.34745		0.94039	0.741411	0.826318	0.898149	0.662046		3.1227		5.0963	4.41662
2s error	0.000228	0.000329	0.000242		0.000486	0.000674	0.000298		8.9e-05		0.000164	0.000277		0.000357	0.000276		0.000126	0.000236	0.000296	0.000128		4.4e-05	6.2e-05		8.7e-05		0.000109	7.8e-05		0.00018	0.000137	0.000288	0.000658	0.00016		4.5e-05		3.4e-05	4.5e-05	3.2e-05	4.6e-05	2.9e-05		0.0002		0.00028	0.000378
Sm	2.17974	2.65346	2.26233		4.23474	2.45393	2.26439		0.7555		1.7021	2.17041		3.23403	2.35395		1.48365	1.9857	2.99157	1.36462		0.6963	0.930418		0.979486		1.054	1.21345		2.53004	1.42023	2.30512	4.24873	1.70666		0.495186		0.464899	0.391413	0.434802	0.455811	0.360669		1.14201		1.64313	1.5323
2s error	0.000757	0.000808	0.000281		0.000384	0.00033	0.000514		5e-05		8.6e-05	9.8e-05		0.003994	0.000908		4.4e-05	0.000157	0.000819	0.00014		1.7e-05	2.7e-05		0.000102		0.000187	6e-05		0.0002	0.00015	0.000107	0.001793	0.000308		3.8e-05		1.8e-05	1.3e-05	1.2e-05	1.4e-05	0.000382		6.4e-05		0.000168	0.000128
Sm/Nd					0.342618	0.325538	0.326047		0.278037		0.413507	0.376548		0.371915	0.361384		0.382078	0.393204	0.423382	0.399661		0.564194	0.47093		0.446862		0.369394	0.378072		0.367305	0.397328	0.389323	0.347835	0.390379		0.367499		0.494368	0.52793	0.526192	0.5075	0.544779		0.365713		0.322416	0.34694
147Sm/144Nd	1e-05	5e-06	3e-06		1e-06	0	3e-06		0.168106		0.25002	0.227672		0.224869	0.2185		0.231015	0.237744	0.255991	0.241647		0.34113	0.28474		0.270182		0.223344	0.228591		0.222082	0.240236	0.235394	0.210309	0.236034		0.222203		0.298915	0.319198	0.318152	0.306851	0.329391		0.221121		0.194939	0.209766
143Nd/144Nd(m)	0.513296	0.513301	0.513157		0.513014	0.512945	0.512976		0.513047		0.513151	0.513134		0.513084	0.513061		0.513117	0.513146	0.513157	0.513134		0.513147	0.51315		0.513067		0.513088	0.513084		0.513094	0.513127	0.513098	0.513094	0.513116		0.513187		0.513209	0.513081	0.513143	0.513148	0.513153		0.513136		0.513057	0.513057
av. duplicate	-	-	-		-	-	-		-		-	-		-	-		-	-	-	-		0.513147	0.513143		-		-	-		-	-	-	-	-		-			0.513134	0.513096	0.513117	0.513086		-		-	-
2s error	9e-06	1e-05	7e-06		6e-06	1.6e-05	8e-06		6e-06		8e-06	9e-06		7e-06	6e-06		7e-06	8e-06	6e-06	9e-06		1e-05	6e-06		1.1e-05		8e-06	5e-06		4e-06	6e-06	1e-05	8e-06	8e-06		7e-06		9e-06	2.3e-05	1e-05	1.2e-05	1e-05		1.3e-05		8e-06	8e-06
143Nd/144Nd(t)	0.513296	0.512376	0.512232		0.512268	0.512236	0.512266		0.512838		0.512883	0.51289		0.512834	0.512818		0.512869	0.512891	0.512883	0.512875		0.512813	0.512871		0.512811		0.512884	0.512875		0.512905	0.512923	0.512898	0.512915	0.512916		0.513013		0.512983	0.512839	0.512902	0.512916	0.512903		0.512992		0.512936	0.512927
published	-	-	-		0.512249	0.512268	0.512255		0.513054		-	-		-	-		-	-	-	-		-	0.513136		-		-	-		-	-	-	-	-		-		0.513268	0.513186	0.513049	0.513085	0.513019		-		-	-
eNdt	12.7965	9.94621	7.13359		6.56999	5.9493	6.53307		9.59757		8.86085	8.99709		8.05856	7.74796		8.59532	9.02036	8.85289	8.70443		7.13603	8.2746		6.97735		8.27121	8.09938		8.44308	8.78572	8.30018	8.63847	8.64081		10.2881		9.59757	8.98284	8.02483	8.28975	8.05352		9.37146		8.16617	7.98636
DeNdi	-5.3622	-1.88901	0.976792		2.05386	3.04529	2.39128		-0.272571		-0.360851	-1.28459		-0.164814	0.314542		-0.589072	-0.526609	-0.0841429	1.72057		1.13897	-0.362103		3.11015		1.55379	1.79437		0.700671	0.620534	0.806067	1.01153	0.365441		-0.0381466		1.60243	-0.732839	-0.406081	-0.546002	-0.622275		-1.26521		0.758832	0.732386
Lu	0.576869	0.624842	0.440558		0.777963	0.452371	0.356376		0.290313		0.431041	0.43462		0.731134	0.372737		0.30437	0.433925	0.503339	0.261065		0.279153	0.3214		0.366256		0.366396	0.523893		0.407777	0.288611	0.425268	0.588087	0.422089		0.151891		0.177288	0.219518	0.246722	0.23112	0.200907		0.230836		0.433704	0.436512
2s error	0.000209	6.6e-05	7.2e-05		0.000134	0.000185	6.7e-05		2.2e-05		0.000115	4.2e-05		0.00023	6.8e-05		0.000653	7.9e-05	8.3e-05	1.7e-05		2.4e-05	1.9e-05		6.5e-05		5.3e-05	5.2e-05		0.000285	3.9e-05	2.5e-05	8.4e-05	9.7e-05		9e-06		1.3e-05	2.3e-05	1.7e-05	1.6e-05	1.9e-05		2.3e-05		7.1e-05	9.8e-05
Hf	4.60742	4.89782	2.62013		5.66491	2.51931	2.40912		1.98343		3.84619	3.89729		4.45521	1.98724		2.27713	3.35881	3.28723	1.9334		2.2174	2.18704		1.96542		2.03792	3.22652		2.36645	1.47385	2.28563	1.08673	2.24981		2.07125		1.80717	1.11204	1.0225	1.13233	0.899912		0.695997		1.96646	2.62615
2s error	0.001094	0.000549	0.000353		0.001038	0.00031	0.000434		0.000196		0.00027	0.000511		0.000664	0.000617		0.000156	0.000375	0.00051	0.000183		0.000169	0.0002		0.000147		0.000107	0.000219		0.000134	0.000102	0.000166	5.2e-05	0.000142		0.000106		0.000144	0.000109	7e-05	8.3e-05	7.1e-05		3.1e-05		0.0001	0.00019
Lu/Hf	0.171952	0.177496	0.218572		0.150424	0.173145	0.160279		0.146369		0.11207	0.111519		0.164108	0.187565		0.133664	0.12919	0.153119	0.135029		0.125892	0.146956		0.118802		0.151243	0.113558		0.172316	0.195822	0.186062	0.541152	0.187611		0.0733332		0.0981026	0.197401	0.241293	0.20411	0.223252		0.331662		0.22055	0.166218
176Lu/177Hf	2e-06	3e-06	5e-06		4e-06	2e-06	3e-06		0.020749		0.0158866	0.0158084		0.0232633	0.0265886		0.0189476	0.0183136	0.0217058	0.0191416		0.0178461	0.020832		0.0168412		0.02144	0.0160978		0.0244272	0.0277594	0.0263758	0.0767147	0.0265953		0.0103956		0.013907	0.027983	0.034205	0.028934	0.0316475		0.0405067		0.031272	0.0235634
178Hf/177Hf	1.46721	1.46722	1.46723		1.46722	1.46722	1.46723		1.46723		1.46726	1.46724		1.46724	1.46726		1.46724	1.46722	1.46727	1.46724		1.46724	1.46722		1.46721		1.46722	1.46723		1.46727	1.46727	1.46725	1.46725	1.46728		1.46724		1.46721	1.46721	1.46725	1.46723	1.46721		1.46722		1.48083	1.48037
2s error	1.3e-05	1.8e-05	2.6e-05		2.2e-05	1.6e-05	2.2e-05		2e-05		1.5e-05	1.7e-05		1.5e-05	2.6e-05		1.3e-05	1.7e-05	1.7e-05	1.8e-05		1.7e-05	1.9e-05		1.2e-05		1.3e-05	1.3e-05		2.1e-05	1.5e-05	1.1e-05	1.5e-05	1.7e-05		1.2e-05		1.7e-05	1.8e-05	1.5e-05	1.8e-05	2.2e-05		1.3e-05		2.2e-05	2.4e-05
176Yb/177Hf	1.5e-05	4.1e-05	0.000111		7.5e-05	2.5e-05	4e-05		1.4e-05		2e-06	1.6e-05		0.000275	0.000148		1e-05	9e-06	5.5e-05	0.000233		1.3e-05	1.9e-05		7e-06		2.9e-05	1.2e-05		3.1e-05	3e-05	3.6e-05	0.000212	1.4e-05		1.2e-05		2.5e-05	2.5e-05	2e-05	3.4e-05	2.8e-05		3.4e-05		9e-06	1.7e-05
Total Hf	26.2624	16.9443	13.988		17.7221	22.926	17.9169		13.7225		19.46	12.66		8.77504	8.01806		18.2728	11.4378	8.57523	10.495		11.5012	11.5364		20.2628		15.7324	14.9559		12.054	16.3602	15.9131	10.2796	14.4119		15.2164		8.74859	11.3079	10.8624	11.2645	6.72584		14.0694		13.2831	9.19714
176Hf/177Hf(m)	0.283017	0.283054	0.283122		0.283048	0.283098	0.283076		0.283161		0.283115	0.283079		0.283109	0.283127		0.283102	0.283122	0.283145	0.283212		0.283115	0.283107		0.283196		0.283198	0.283187		0.283176	0.283196	0.283179	0.283326	0.283175		0.283197		0.283249	0.283146	0.283131	0.283125	0.283117		0.283165		0.283185	0.283162
2s error	7e-06	8e-06	8e-06		8e-06	8e-06	8e-06		7e-06		5e-06	7e-06		9e-06	8e-06		7e-06	6e-06	1e-05	8e-06		8e-06	9e-06		5e-06		8e-06	6e-06		7e-06	7e-06	6e-06	9e-06	7e-06		6e-06		7e-06	8e-06	7e-06	8e-06	1.1e-05		8e-06		8e-06	8e-06
176Hf/177Hf(t)	0.282742	0.282771	0.282773		0.282828	0.282845	0.282841		0.283087		0.283067	0.283031		0.283035	0.283043		0.283044	0.283066	0.283079	0.283154		0.283065	0.283049		0.28315		0.283142	0.283145		0.283117	0.283129	0.283115	0.28314	0.283111		0.283173		0.283219	0.283085	0.283057	0.283062	0.283048		0.283089		0.283129	0.28312
eHft	11.8949	12.8915	12.9766		13.7982	14.3913	14.279		14.92		13.6	12.34		12.63	12.9		12.81	13.59	14.03	16.68		13.24	12.66		16.14		15.72	15.83		14.63	15.05	14.57	15.44	14.41		16.4		17.92	13.2	12.19	12.39	11.89		12.97		14.28	13.95
DeHfi	8.57951	3.02242	-1.56287		-3.28617	-4.87247	-3.82605		0.436114		0.577362	2.05535		0.263703	-0.503267		0.942515	0.842574	0.134629	-2.75292		-1.82236	0.579365		-4.97624		-2.48606	-2.87099		-1.12107	-0.992855	-1.28971	-1.61845	-0.584705		0.0610346		-2.56389	1.17254	0.649729	0.873603	0.99564		2.02433		-1.21413	-1.17182
	Major element data for samples 144 and 157 from Safonova et al., 2008; 1-143, unpublished data. Trace and rare earth element data by ICPMS, Open University. Isotope data collected at NIGL, UK.				Major, trace and rare earth element data from Hou et al., 2006. Isotope data collected at NIGL, UK.				Major, trace and REE data by INAA (ILM previously unpublished data).		Trace & REE data by ICPMS, Open University. Isotope data collected at NIGL, UK. (Note: rock sampled from same location as samples IC21/8 and /9 of Montanini et al., 2008, where major, trace , REE element and Nd isotopes are presented).	Trace & REE data by ICPMS, Open University. Isotope data collected at NIGL, UK. (Note: rock sampled from same location as E79 of Montanini et al., 2008, where major, trace and REE data are presented).		Trace and REE data collected by ICPMS at Open University, UK. Isotope data collected at NIGL, UK.			Major elements from Sanfilippo & Tribuzio, 2011. Trace & REE data by ICPMS at Open University. Isotope data collected at NIGL, UK.	Trace & REE data by ICPMS at Open University. Isotope data collected at NIGL, UK.(Note: rock sampled from same location as samples RFR1/1-1/3 of Rampone et al., 1998, where major elements, trace and REE elements are presented for those samples).		Major elements from Sanfilippo & Tribuzio, 2011. Trace & REE data by ICPMS at Open University. Isotope data collected at NIGL, UK.		Major element data from ADS, previously unpublished. Isotope data collected at NIGL, UK.			Major, trace and REE data from Khan et al., 2007. Isotope data collected at NIGL, UK.		Trace and REE data collected by ICPMS at Open University, UK. Isotope data collected at NIGL, UK.			Major, trace and REE data from Niu et al., 2006. Isotope data collected at NIGL, UK.						Trace and REE data collected by ICPMS at Open University, UK. Isotope data collected at NIGL, UK.		Trace and REE data collected by ICPMS at Open University, UK. Isotope data collected at NIGL, UK.						Major, trace and REE data by A.Kerr previously unpublished. Isotope data collected at NIGL, UK.		Majors, trace and REE data from Godard et al., 2006. Isotope data collected at NIGL, UK.
